# Supplementary material for: Variability in Clinical Outcomes for Youths Treated for Subthreshold Severe Mental Disorders at an Early Intervention Service
Source: Atypon-hosted journal article supplement (doi:10.1176/appi.ps.201700046), 2018-01-16
Supplement: appi.ps.201700046.ds001.pdf [file appi.ps.201700046.ds001.pdf]

*Appendix 1.* Stepwise logistic regressions predicting functioning (SOFAS), distress (K10) and symptoms (BPRS) at 6 months.

*Model 1*

| <b>K10</b>                | <b><math>\beta</math></b> | <b>SE of <math>\beta</math></b> | <b>t</b> | <b>Sig.</b> | <b>95% CI</b>   |
|---------------------------|---------------------------|---------------------------------|----------|-------------|-----------------|
| Constant                  | 16.90                     | 1.60                            | 10.59    | .000        | (13.76 - 20.04) |
| Baseline K10              | .31                       | .05                             | 6.83     | .000        | (.22 - .40)     |
| Total Psychiatry Sessions | .21                       | .10                             | 2.26     | .025        | (.03 - .40)     |

\* variables excluded in model 2: age, age of onset, sex, baseline SOFAS, baseline BPRS, total psychology sessions, CI= confidence interval

*Model 2*

| <b>BPRS</b>               | <b><math>\beta</math></b> | <b>SE of <math>\beta</math></b> | <b>t</b> | <b>Sig.</b> | <b>95% CI</b> |
|---------------------------|---------------------------|---------------------------------|----------|-------------|---------------|
| Constant                  | 36.93                     | 1.79                            | 20.68    | .000        | 33.41 - 40.45 |
| Baseline K10              | .09                       | .04                             | 2.36     | .019        | .01 - .16     |
| Total Psychiatry Sessions | -.16                      | .08                             | -2.07    | .039        | -.31 - -.01   |
| Age of onset              | -.21                      | .11                             | -1.99    | .048        | -.41 - -.00   |

\* variables excluded in model 3: age, sex, baseline SOFAS, baseline BPRS, total psychology sessions, CI= confidence interval

*Model 3*

| <b>SOFAS</b>                           | <b><math>\beta</math></b> | <b>SE of <math>\beta</math></b> | <b>t</b> | <b>Sig.</b> | <b>95% CI</b> |
|----------------------------------------|---------------------------|---------------------------------|----------|-------------|---------------|
| Constant                               | 54.02                     | 2.70                            | 19.98    | .000        | 48.69 - 59.34 |
| SOFAS                                  | .20                       | .04                             | 4.62     | .000        | .12 - .29     |
| Total Psychiatry & Psychology Sessions | -.10                      | .05                             | -2.02    | .045        | -.19 - -.00   |
